# Supplementary material
Source: PubMed Central journal article supplement (PMC9852361)
Supplement: NIHMS1809714-supplement-Supp1.pdf [file NIHMS1809714-supplement-Supp1.pdf]

## Supplementary Text 1

### 1 Data Ascertainment

Patients from the FaceBase repository (collection: FB00000861) were recruited at patient meetings and genetics clinics in Colorado, Los Angeles, San Francisco, Stanford, USA and Alberta, Canada. If patients were recruited at a patient meeting, diagnosis was usually self-reported. When patients were seen at a clinic, a clinical diagnosis was established by a clinical geneticist, often followed by molecular confirmation. Patients in the database of the Western Australian Health Department were ascertained through multi-stakeholder (including patient) scientific meetings after individual in person review by a clinical geneticist (author GB) or via clinical geneticists directly from clinical genetics services. Patients in Peter Hammond's collection were recruited at patient support groups across the United States, UK and Italy. At initial recruitment, diagnosis was recorded as reported by families or suggested by clinical geneticists attending the meetings; some patients were in contact over several years and molecular diagnoses were reported by parents or by collaborating clinical geneticists.

### 2 Age-related changes to variation and similarity statistics

In the main text we use facial signatures to describe each patient. These represent how each patient differs from an age- and sex- appropriate normal reference population. Using facial signatures adjusts for the effects of normal growth and development on the face. However, age-related changes due to abnormal growth (such as the gradual appearance of syndrome-specific features) may still occur and these can affect the statistics presented in this paper. In this section we investigate these changes in the sample of RASopathies.

#### 2.1 Age-related changes to directional variation

Directional variation is defined as the central tendency of the distribution of cosine distances from the mean signature. To investigate age-related changes to directional variation we regressed cosine distance to the mean signature onto age within each of the four syndromes. This was done using ordinary least-squares regression. The results are shown in Supplementary Text Figure 1. The regressions within CS and NS were significant suggesting that directional variation declines with age in these syndromes.

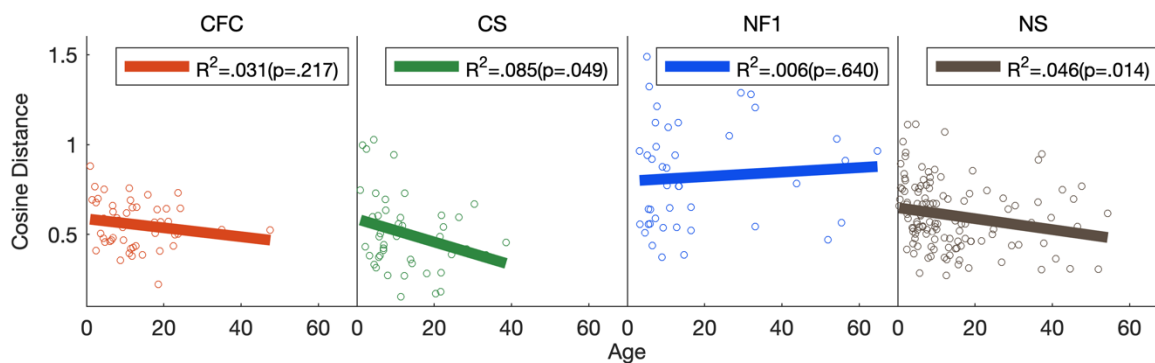

Supplementary Text Figure 1. Age-related changes to the directional variation statistic. In general cosine distance to the mean signature declines with age in CS and NS.

## 2.2 Age-related changes to severity and severity variation

We assessed age-related changes to severity via ordinary least-squares regression of severity onto age. Severity variation is the dispersion of severity scores from their central tendency. To assess age-related changes to severity variation we tested for changes to the dispersion relative to the linear regression (i.e. the dispersion of the residuals of the regression) using the Breusch-Pagan test for heteroscedasticity. Results are shown Supplementary Text Figure 2. CFC and CS become more severe with age. There is no evidence of heteroscedasticity for any of the syndromes and thus no evidence for age-related changes in severity variation.

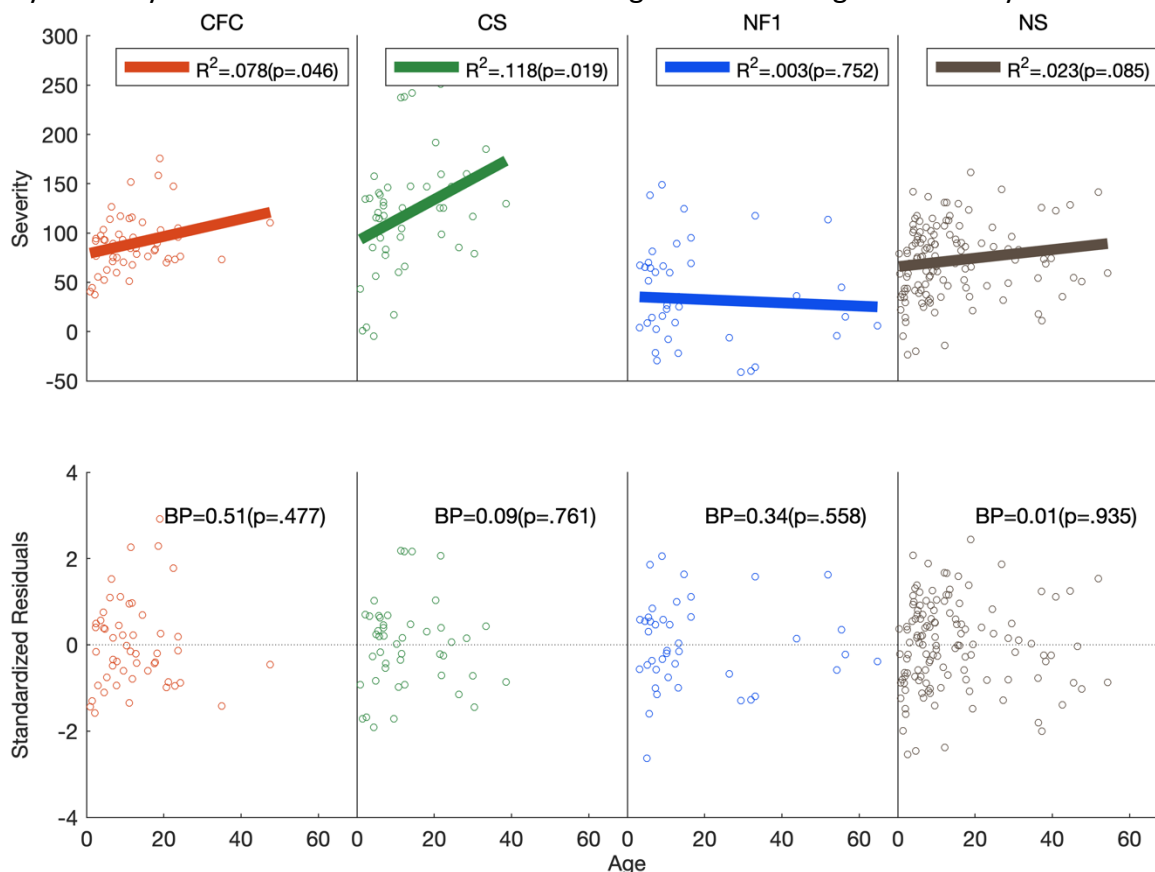

Supplementary Text Figure 2. Age-related changes in severity and severity variation. The top row plots the linear regression of severity onto age. CFC and CS become more severe with age. The bottom row plots the standardized residuals of each regression. BP denotes the Breusch-Pagan statistic.

## 2.3 Age-related changes to the typical phenotype and the phenotype agreement statistics

Age-related changes to phenotype agreement were assessed by firstly modelling the age-related change in the facial signatures for each syndrome. This was approximated using a multivariate linear partial least-squares regression of the signatures onto age. This fits the model:

$$\hat{Y} = MX + C$$

Where  $\hat{Y}$  denotes the matrix of fitted values (expected signatures),  $M$  denotes the matrix of regression coefficients,  $X$  denotes the matrix of predictors (in this case only age), and  $C$  denotes the matrix of constant values. A model was fitted separately for each syndrome and statistical significance was evaluated using a permutation test on the variance explained ( $R^2$ ) as per Shrimpton et al. [1]. The regressions were also evaluated at ages 5 and 50, yielding

expected signatures for each age for each syndrome. As these result from the imposition of a linear model, where changes would in fact be expected to be non-linear, these should not be taken as exact age-specific estimates of the typical phenotype. Nevertheless, comparing the expected signatures at different ages can reveal the general trend of changes in the phenotype. For calculating phenotype agreement and statistical significance we used as signatures feature vectors combining signatures in the x y and z direction, as were used as the basis for all statistical analysis in this article. For illustrating the expected signatures we fitted separate models regressing the signatures in the direction normal to the surface onto age.

For illustration, the expected signatures in the direction normal to the surface are shown in Supplementary Text Figure 3 part (a). The regressions for CS ( $R^2=.070$ ;  $p<.001$ ) and NS ( $R^2=.020$ ;  $p=.003$ ) were significant. In general, the trend in CS is for features to become more extreme (the colors become deeper) consistent with the age-related change in severity observed in section 2.2 above. The submalar and mandibular portion of the cheeks also become less prominent (this region goes from being orange to light blue). In NS the prominence of the lips increases (this region becomes redder). The forehead and chin become bluer consistent with increased retrusion of the forehead and increased micrognathia. The middle malar and submalar regions of the cheeks become more prominent (redder). The regressions for CFC ( $R^2=.031$ ;  $p=.109$ ) and NF1 were non-significant ( $R^2=.019$ ;  $p=.641$ ).

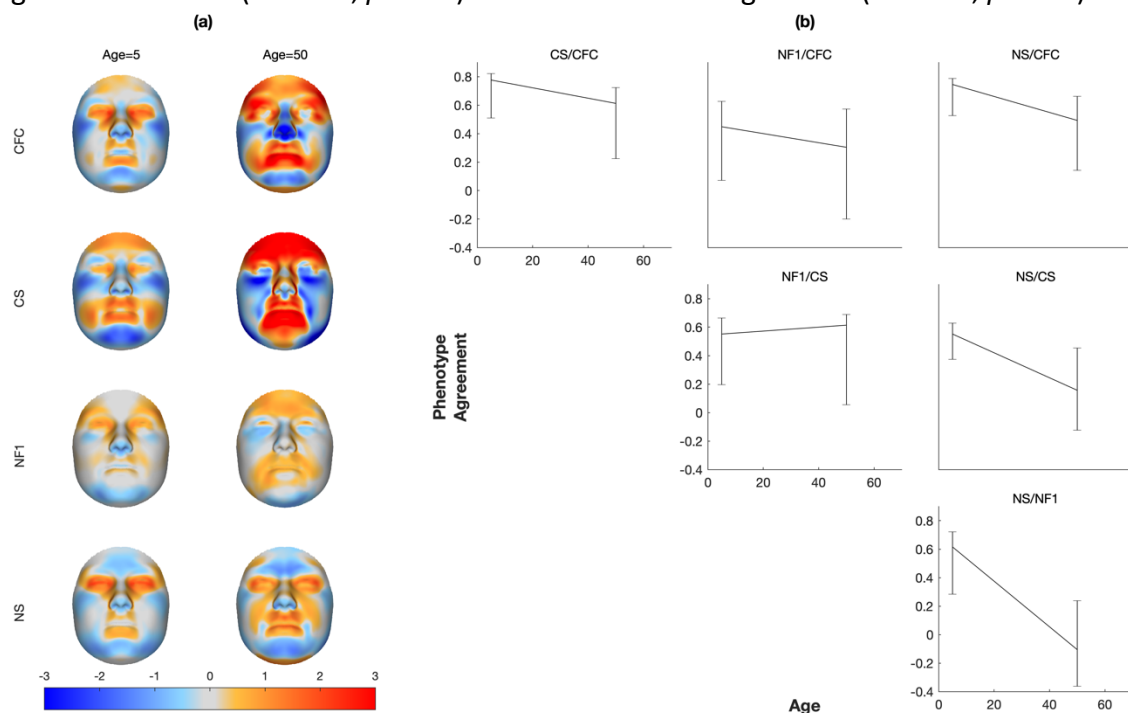

Supplementary Text Figure 3. Age-related changes in the typical phenotype and changes in the phenotype agreement statistic. Part (a) plots the expected signature at ages 5 and 50 predicted by a linear regression of the signatures in the direction normal to the facial surface (red indicates outward displacement, blue indicates inward displacement). Part (b) plots the expected changes in the phenotype agreement statistic as a result of the changes in the typical phenotype. 95% confidence intervals were calculated by resampling the data within each syndrome with replacement 1000 times, refitting the models and reevaluating the expected signatures and phenotype agreement.

To assess how these changes affect the phenotype agreement statistic the phenotype agreement (cosine) between corresponding pairs of expected signatures was calculated. For example, to estimate the phenotype agreement between CS and NS at age 5 the cosine

between the expected signatures for CS at age 5 and for NS at age 5 was computed. Comparing the phenotype agreement at age 5 to age 50 reveals the general trend of how age-related changes in the phenotype influence the phenotype agreement statistic. These trends are plotted in Supplementary Text Figure 3 part (b). In general, the trend is for each syndrome to become more distinct (phenotype agreement decreases between all pairs of syndromes except NF1 and CS). The largest divergence is between NS and NF1 and NS and CS.

#### 2.4 Age-related changes to severity differences

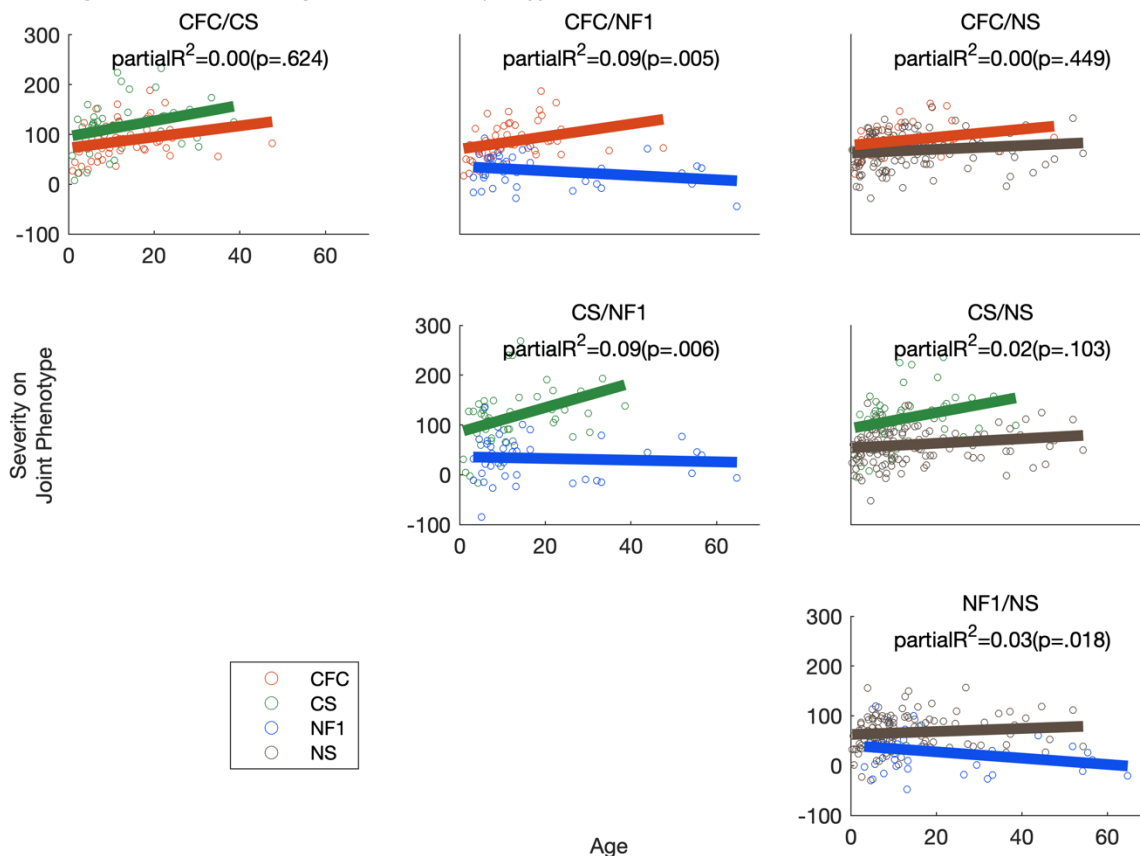

Supplementary Text Figure 4. Age-related changes to severity difference statistics. Each panel plots the severity scores along a combined phenotype for a particular pair of syndromes as a function of age. This is annotated with the linear regressions of age onto severity computed separately for each group. Text labels show the partial R<sup>2</sup> and p value associated with the interaction term of the corresponding general linear model (see text) and indicate the significance of the differences between regression slopes.

Severity difference is the difference between the central tendencies of the distributions of severity scores (expressed as Cohen's D statistic) of two syndromes. For calculating severity difference, severity is calculated with respect to the combined typical phenotype of both syndromes (estimated as the mean of the two mean signatures of the syndromes separately). This is done to jointly ordinate both syndromes on a common axis. To assess age-related changes in severity difference between each pair of syndromes we compare the slopes of linear regressions of these severity scores for each syndrome. This was done for each pair of syndromes by fitting a general linear model consisting of a main effect of syndrome (with two levels corresponding to the two syndromes in question), a main effect of age and a syndrome\*age interaction. A significant interaction term indicates the slopes of the

regressions of age on severity differ between the two groups and that the difference in severity is either increasing or decreasing. Results are plotted in Supplementary Text Figure 4. For NF1 paired with CFC and CS and NF1 paired with NS the interaction is significant indicating that severity difference increases with age between these pairs of syndromes.

### References

- 1 Shrimpton S, Daniels K, De Greef S, Tilotta F, Willems G, Vandermeulen D, Suetens P, Claes P. A spatially-dense regression study of facial form and tissue depth: Towards an interactive tool for craniofacial reconstruction. *Forensic Science International* 2014;**234**:103–10.

## Supplementary Figures

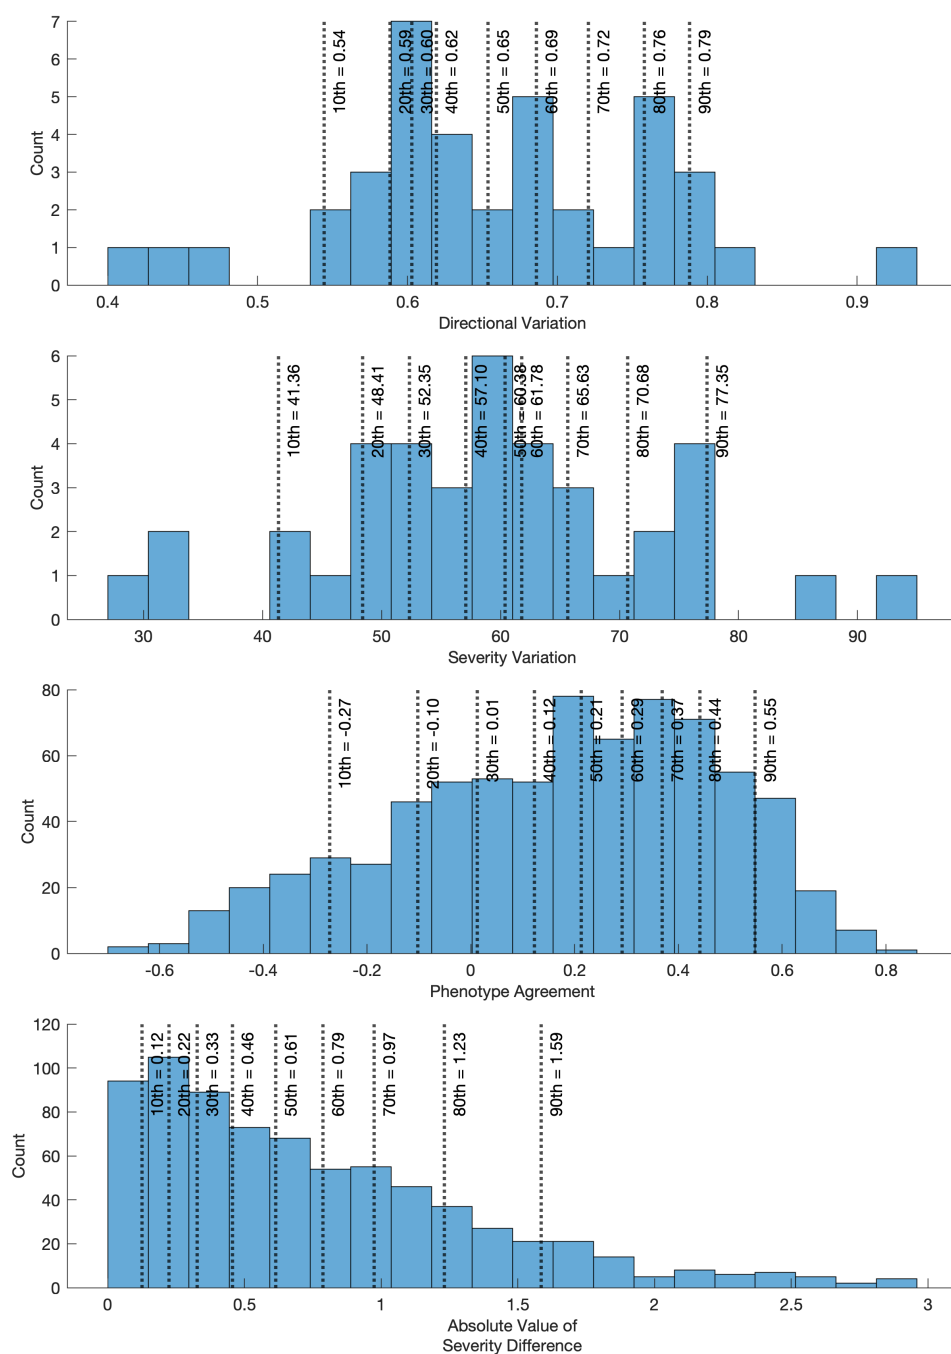

Supplementary Figure 1. Distributions of the directional variation, severity variation, phenotype agreement and severity difference statistics computed from the sample of disorders described in Supplementary Table 2.

## Supplementary Tables

Supplementary Table 1. Image exclusion criteria. This shows the numbers remaining in each sample after each successive exclusion criterion was applied. Images were excluded due to 1) poor image quality including non-neutral facial expression, 2) missing data on age and sex or ethnicity, 3) failed image registration, 4) being a duplicate image of a patient already included in the analysis and 5) non-European ancestry. The final row, therefore, shows final numbers after all exclusion criteria were applied.

|                                 | <b>CFC</b> | <b>CS</b> | <b>NF1</b> | <b>NS</b> |
|---------------------------------|------------|-----------|------------|-----------|
| <b>INITIAL NUMBERS</b>          | 76         | 77        | 94         | 174       |
| <b>POOR IMAGE QUALITY</b>       | 62         | 60        | 87         | 161       |
| <b>MISSING DEMOGRAPHIC DATA</b> | 57         | 54        | 60         | 143       |
| <b>REGISTRATION FAILED</b>      | 54         | 47        | 58         | 139       |
| <b>DUPLICATE PATIENT</b>        | 54         | 46        | 55         | 132       |
| <b>NON-EUROPEAN ANCESTRY</b>    | 51         | 46        | 42         | 129       |

Supplementary Table 2. Age, sex, clinical, and, where available, molecular diagnoses for each participant. Where available the molecular diagnosis at the gene, DNA and protein level as well as the variant's American College of Medical Genetics (ACMG) classification is reported.

| Patient Study ID | Age (years) | Sex | Diagnosis                     | Molecular confirmation available | Gene   | DNA      | Protein     | ACMG classification |
|------------------|-------------|-----|-------------------------------|----------------------------------|--------|----------|-------------|---------------------|
| CFC001           | 12.1        | M   | Cardiofaciocutaneous syndrome | Yes                              | MEK2   |          |             |                     |
| CFC002           | 19.2        | F   | Cardiofaciocutaneous syndrome | Yes                              | BRAF   |          |             |                     |
| CFC003           | 2.2         | M   | Cardiofaciocutaneous syndrome | No                               |        |          |             |                     |
| CFC004           | 2.5         | F   | Cardiofaciocutaneous syndrome | Yes                              | BRAF   |          |             |                     |
| CFC005           | 1.5         | F   | Cardiofaciocutaneous syndrome | No                               |        |          |             |                     |
| CFC006           | 11.4        | M   | Cardiofaciocutaneous syndrome | Yes                              | BRAF   |          |             |                     |
| CFC007           | 17.8        | F   | Cardiofaciocutaneous syndrome | No                               |        |          |             |                     |
| CFC008           | 9.4         | M   | Cardiofaciocutaneous syndrome | Yes                              | BRAF   |          |             |                     |
| CFC009           | 3.7         | F   | Cardiofaciocutaneous syndrome | Yes                              | BRAF   |          |             |                     |
| CFC010           | 4.6         | F   | Cardiofaciocutaneous syndrome | Yes                              | BRAF   |          |             |                     |
| CFC011           | 7.8         | F   | Cardiofaciocutaneous syndrome | Yes                              | MEK1   |          |             |                     |
| CFC012           | 4.4         | M   | Cardiofaciocutaneous syndrome | Yes                              | BRAF   |          |             |                     |
| CFC013           | 19.0        | F   | Cardiofaciocutaneous syndrome | Yes                              | MEK1   |          |             |                     |
| CFC014           | 6.5         | F   | Cardiofaciocutaneous syndrome | No                               |        |          |             |                     |
| CFC015           | 11.8        | F   | Cardiofaciocutaneous syndrome | Yes                              | BRAF   |          |             |                     |
| CFC016           | 11.1        | M   | Cardiofaciocutaneous syndrome | No                               |        |          |             |                     |
| CFC017           | 15.9        | F   | Cardiofaciocutaneous syndrome | Yes                              | MEK1   |          |             |                     |
| CFC018           | 6.9         | F   | Cardiofaciocutaneous syndrome | Yes                              | BRAF   |          |             |                     |
| CFC019           | 7.9         | M   | Cardiofaciocutaneous syndrome | Yes                              | BRAF   |          |             |                     |
| CFC020           | 8.8         | F   | Cardiofaciocutaneous syndrome | Yes                              | BRAF   | c.770A>G | p.Gln257Arg | Pathogenic          |
| CFC021           | 18.3        | F   | Cardiofaciocutaneous syndrome | No                               |        |          |             |                     |
| CFC022           | 20.7        | M   | Cardiofaciocutaneous syndrome | Yes                              | MAP2K1 | c.389A>G | p.Tyr130Cys | Pathogenic          |
| CFC023           | 22.8        | M   | Cardiofaciocutaneous syndrome | No                               |        |          |             |                     |
| CFC024           | 9.6         | M   | Cardiofaciocutaneous syndrome | No                               |        |          |             |                     |



|        |      |   |                               |     |        |           |             |                   |
|--------|------|---|-------------------------------|-----|--------|-----------|-------------|-------------------|
| CFC025 | 6.1  | M | Cardiofaciocutaneous syndrome | No  |        |           |             |                   |
| CFC026 | 4.8  | F | Cardiofaciocutaneous syndrome | Yes | BRAF   | c.1787G>T | p.Gly596Val | Pathogenic        |
| CFC027 | 24.3 | F | Cardiofaciocutaneous syndrome | No  |        |           |             |                   |
| CFC028 | 6.8  | M | Cardiofaciocutaneous syndrome | Yes | BRAF   |           |             |                   |
| CFC029 | 11.4 | F | Cardiofaciocutaneous syndrome | Yes | BRAF   | c.770A>G  | p.Gln257Arg | Pathogenic        |
| CFC030 | 11.9 | M | Cardiofaciocutaneous syndrome | Yes | BRAF   | c.1787G>T | p.Gly596Val | Pathogenic        |
| CFC031 | 23.7 | M | Cardiofaciocutaneous syndrome | Yes | BRAF   |           |             |                   |
| CFC032 | 0.9  | F | Cardiofaciocutaneous syndrome | Yes | BRAF   | c.1497A>C | p.Lys499Asn | Pathogenic        |
| CFC033 | 6.8  | F | Cardiofaciocutaneous syndrome | Yes | BRAF   | c.1406G>A | p.Gly469Glu | Pathogenic        |
| CFC034 | 3.0  | M | Cardiofaciocutaneous syndrome | Yes | BRAF   |           |             |                   |
| CFC035 | 17.6 | F | Cardiofaciocutaneous syndrome | Yes | BRAF   |           |             |                   |
| CFC036 | 13.0 | M | Cardiofaciocutaneous syndrome | Yes | MAP2K1 | c.389A>G  | p.Tyr130Cys | Pathogenic        |
| CFC037 | 22.5 | F | Cardiofaciocutaneous syndrome | Yes | BRAF   |           |             |                   |
| CFC038 | 14.5 | M | Cardiofaciocutaneous syndrome | Yes | MAP2K2 | c.395G>A  | p.Gly132Asp | Likely Pathogenic |
| CFC039 | 18.6 | F | Cardiofaciocutaneous syndrome | No  |        |           |             |                   |
| CFC040 | 8.4  | M | Cardiofaciocutaneous syndrome | Yes | BRAF   |           |             |                   |
| CFC041 | 4.5  | M | Cardiofaciocutaneous syndrome | No  |        |           |             |                   |
| CFC042 | 12.8 | M | Cardiofaciocutaneous syndrome | Yes | BRAF   |           |             |                   |
| CFC043 | 2.4  | M | Cardiofaciocutaneous syndrome | No  |        |           |             |                   |
| CFC044 | 11.1 | F | Cardiofaciocutaneous syndrome | Yes | BRAF   |           |             |                   |
| CFC045 | 10.4 | F | Cardiofaciocutaneous syndrome | No  |        |           |             |                   |
| CFC046 | 21.2 | F | Cardiofaciocutaneous syndrome | No  |        |           |             |                   |
| CFC047 | 23.7 | F | Cardiofaciocutaneous syndrome | No  |        |           |             |                   |
| CFC048 | 47.6 | M | Cardiofaciocutaneous syndrome | Yes | BRAF   |           |             |                   |
| CFC049 | 35.0 | F | Cardiofaciocutaneous syndrome | Yes | BRAF   | c.1787G>T | p.Gly596Val | Pathogenic        |
| CFC050 | 2.5  | F | Cardiofaciocutaneous syndrome | No  |        |           |             |                   |
| CFC051 | 5.3  | M | Cardiofaciocutaneous syndrome | No  |        |           |             |                   |

|             |      |   |                   |     |      |         |            |            |
|-------------|------|---|-------------------|-----|------|---------|------------|------------|
| Costello001 | 0.9  | F | Costello syndrome | Yes | HRAS |         |            |            |
| Costello002 | 11.4 | F | Costello syndrome | No  |      |         |            |            |
| Costello003 | 10.3 | M | Costello syndrome | No  |      |         |            |            |
| Costello004 | 4.5  | M | Costello syndrome | Yes | HRAS |         |            |            |
| Costello005 | 12.3 | F | Costello syndrome | Yes | HRAS |         |            |            |
| Costello006 | 11.8 | F | Costello syndrome | Yes | HRAS |         |            |            |
| Costello007 | 26.4 | M | Costello syndrome | Yes | HRAS |         |            |            |
| Costello008 | 24.5 | M | Costello syndrome | Yes | HRAS |         |            |            |
| Costello009 | 22.4 | M | Costello syndrome | Yes | HRAS |         |            |            |
| Costello010 | 5.8  | F | Costello syndrome | Yes | HRAS |         |            |            |
| Costello011 | 21.8 | F | Costello syndrome | Yes | HRAS |         |            |            |
| Costello012 | 18.1 | F | Costello syndrome | Yes | HRAS |         |            |            |
| Costello013 | 21.5 | M | Costello syndrome | Yes | HRAS |         |            |            |
| Costello014 | 5.7  | M | Costello syndrome | Yes | HRAS |         |            |            |
| Costello015 | 21.9 | F | Costello syndrome | Yes | HRAS |         |            |            |
| Costello016 | 13.9 | F | Costello syndrome | Yes | HRAS |         |            |            |
| Costello017 | 11.6 | F | Costello syndrome | Yes | HRAS |         |            |            |
| Costello018 | 33.4 | F | Costello syndrome | No  |      |         |            |            |
| Costello019 | 6.8  | F | Costello syndrome | Yes | HRAS | c.34G>T | p.Gly12Cys | Pathogenic |
| Costello020 | 20.3 | M | Costello syndrome | Yes | HRAS | c.34G>A | p.Gly12Ser | Pathogenic |
| Costello021 | 5.0  | M | Costello syndrome | Yes | HRAS | c.34G>A | p.Gly12Ser | Pathogenic |
| Costello022 | 7.9  | F | Costello syndrome | Yes | HRAS | c.37G>T | p.Gly13Cys | Pathogenic |
| Costello023 | 30.0 | M | Costello syndrome | Yes | HRAS | c.34G>A | p.Gly12Ser | Pathogenic |
| Costello024 | 4.3  | F | Costello syndrome | Yes | HRAS | c.37G>T | p.Gly13Cys | Pathogenic |
| Costello025 | 14.3 | M | Costello syndrome | Yes | HRAS | c.34G>A | p.Gly12Ser | Pathogenic |
| Costello026 | 30.4 | F | Costello syndrome | Yes | HRAS | c.34G>A | p.Gly12Ser | Pathogenic |
| Costello027 | 5.9  | F | Costello syndrome | Yes | HRAS | c.34G>T | p.Gly12Cys | Pathogenic |

|             |      |   |                          |     |      |           |              |            |
|-------------|------|---|--------------------------|-----|------|-----------|--------------|------------|
| Costello028 | 38.6 | F | Costello syndrome        | Yes | HRAS | c.34G>A   | p.Gly12Ser   | Pathogenic |
| Costello029 | 6.9  | F | Costello syndrome        | Yes | HRAS | c.34G>A   | p.Gly12Ser   | Pathogenic |
| Costello030 | 1.4  | F | Costello syndrome        | Yes | HRAS | c.34G>A   | p.Gly12Ser   | Pathogenic |
| Costello031 | 21.7 | F | Costello syndrome        | Yes | HRAS | c.34G>A   | p.Gly12Ser   | Pathogenic |
| Costello032 | 4.9  | F | Costello syndrome        | Yes | HRAS | c.34G>A   | p.Gly12Ser   | Pathogenic |
| Costello033 | 2.2  | F | Costello syndrome        | Yes | HRAS | c.34G>A   | p.Gly12Ser   | Pathogenic |
| Costello034 | 11.2 | F | Costello syndrome        | Yes | HRAS | c.34G>A   | p.Gly12Ser   | Pathogenic |
| Costello035 | 4.0  | F | Costello syndrome        | Yes | HRAS | c.34G>A   | p.Gly12Ser   | Pathogenic |
| Costello036 | 7.4  | F | Costello syndrome        | Yes | HRAS | c.34G>A   | p.Gly12Ser   | Pathogenic |
| Costello037 | 9.6  | M | Costello syndrome        | Yes | HRAS | c.34G>A   | p.Gly12Ser   | Pathogenic |
| Costello038 | 6.1  | F | Costello syndrome        | Yes | HRAS | c.34G>A   | p.Gly12Ser   | Pathogenic |
| Costello039 | 3.2  | F | Costello syndrome        | No  |      |           |              |            |
| Costello040 | 12.4 | F | Costello syndrome        | Yes | HRAS | c.34G>A   | p.Gly12Ser   | Pathogenic |
| Costello041 | 5.4  | F | Costello syndrome        | Yes | HRAS | c.34G>T   | p.Gly12Cys   | Pathogenic |
| Costello042 | 6.8  | M | Costello syndrome        | Yes | HRAS | c.34G>A   | p.Gly12Ser   | Pathogenic |
| Costello043 | 2.4  | F | Costello syndrome        | Yes | HRAS | c.37G>T   | p.Gly13Cys   | Pathogenic |
| Costello044 | 7.4  | M | Costello syndrome        | Yes | HRAS | c.34G>A   | p.Gly12Ser   | Pathogenic |
| Costello045 | 28.4 | M | Costello syndrome        | Yes | HRAS | c.34G>A   | p.Gly12Ser   | Pathogenic |
| Costello046 | 10.7 | M | Costello syndrome        | Yes | HRAS | c.37G>T   | p.Gly13Cys   | Pathogenic |
| NF001       | 13.4 | M | Neurofibromatosis type 1 | Yes | NF1  | c.7954C>T | p.Gln2652Ter | Pathogenic |
| NF002       | 7.7  | M | Neurofibromatosis type 1 | Yes | NF1  |           |              |            |
| NF003       | 13.3 | F | Neurofibromatosis type 1 | No  |      |           |              |            |
| NF004       | 3.3  | M | Neurofibromatosis type 1 | No  |      |           |              |            |
| NF005       | 54.3 | F | Neurofibromatosis type 1 | No  |      |           |              |            |
| NF006       | 10.6 | M | Neurofibromatosis type 1 | No  |      |           |              |            |
| NF007       | 51.9 | F | Neurofibromatosis type 1 | No  |      |           |              |            |
| NF008       | 16.5 | M | Neurofibromatosis type 1 | Yes | NF1  | c.1466A>G | p.Tyr489Cys  | Pathogenic |

|       |      |   |                          |     |     |                      |                      |            |
|-------|------|---|--------------------------|-----|-----|----------------------|----------------------|------------|
| NF009 | 10.2 | M | Neurofibromatosis type 1 | No  |     |                      |                      |            |
| NF010 | 12.8 | F | Neurofibromatosis type 1 | Yes | NF1 | Deletion exons 39-45 |                      | Pathogenic |
| NF011 | 7.5  | F | Neurofibromatosis type 1 | No  |     |                      |                      |            |
| NF012 | 9.3  | F | Neurofibromatosis type 1 | No  |     |                      |                      |            |
| NF013 | 10.9 | F | Neurofibromatosis type 1 | No  |     |                      |                      |            |
| NF014 | 12.3 | M | Neurofibromatosis type 1 | No  |     |                      |                      |            |
| NF015 | 5.5  | M | Neurofibromatosis type 1 | Yes | NF1 | c.1756_1759del       | p.Thr586ValfsTer18   | Pathogenic |
| NF016 | 7.3  | F | Neurofibromatosis type 1 | No  |     |                      |                      |            |
| NF017 | 5.8  | F | Neurofibromatosis type 1 | Yes | NF1 | Microdeletion        |                      | Pathogenic |
| NF018 | 9.1  | F | Neurofibromatosis type 1 | Yes | NF1 | c.3457_3460del       | p.Leu1153fsMetfsTer4 | Pathogenic |
| NF019 | 13.2 | M | Neurofibromatosis type 1 | No  |     |                      |                      |            |
| NF020 | 4.6  | F | Neurofibromatosis type 1 | Yes | NF1 | c.7031del            | p.Asn2344IlefsTer31  | Pathogenic |
| NF021 | 16.5 | F | Neurofibromatosis type 1 | Yes | NF1 |                      |                      |            |
| NF022 | 6.4  | M | Neurofibromatosis type 1 | No  |     |                      |                      |            |
| NF023 | 3.2  | M | Neurofibromatosis type 1 | No  |     |                      |                      |            |
| NF024 | 5.5  | F | Neurofibromatosis type 1 | No  |     |                      |                      |            |
| NF025 | 5.2  | M | Neurofibromatosis type 1 | No  |     |                      |                      |            |
| NF026 | 6.0  | F | Neurofibromatosis type 1 | Yes | NF1 | c.3938_3942del       | p.Asp1313AlafsTer4   | Pathogenic |
| NF027 | 8.9  | M | Neurofibromatosis type 1 | No  |     |                      |                      |            |
| NF028 | 33.1 | M | Neurofibromatosis type 1 | No  |     |                      |                      |            |
| NF029 | 56.5 | F | Neurofibromatosis type 1 | No  |     |                      |                      |            |
| NF030 | 10.3 | M | Neurofibromatosis type 1 | No  |     |                      |                      |            |
| NF031 | 6.3  | F | Neurofibromatosis type 1 | No  |     |                      |                      |            |
| NF032 | 64.8 | F | Neurofibromatosis type 1 | No  |     |                      |                      |            |
| NF033 | 7.3  | F | Neurofibromatosis type 1 | No  |     |                      |                      |            |
| NF034 | 26.4 | F | Neurofibromatosis type 1 | Yes | NF1 | c.1019_1020del       | p.Ser340CysfsTer12   | Pathogenic |
| NF035 | 55.4 | F | Neurofibromatosis type 1 | No  |     |                      |                      |            |

|           |      |   |                          |     |        |           |                     |            |
|-----------|------|---|--------------------------|-----|--------|-----------|---------------------|------------|
| NF036     | 43.8 | F | Neurofibromatosis type 1 | No  |        |           |                     |            |
| NF037     | 32.0 | F | Neurofibromatosis type 1 | No  |        |           |                     |            |
| NF038     | 33.1 | M | Neurofibromatosis type 1 | No  |        |           |                     |            |
| NF039     | 14.7 | M | Neurofibromatosis type 1 | No  |        |           |                     |            |
| NF040     | 29.4 | M | Neurofibromatosis type 1 | No  |        |           |                     |            |
| NF041     | 5.7  | F | Neurofibromatosis type 1 | No  |        |           |                     |            |
| NF042     | 5.1  | M | Neurofibromatosis type 1 | Yes | NF1    | c.4105del | p.Tyr1369ThrfsTer16 | Pathogenic |
| Noonan001 | 2.4  | M | Noonan syndrome          | No  |        |           |                     |            |
| Noonan002 | 28.6 | F | Noonan syndrome          | Yes | PTPN11 |           |                     |            |
| Noonan003 | 14.9 | M | Noonan syndrome          | Yes | RAF1   |           |                     |            |
| Noonan004 | 5.0  | F | Noonan syndrome          | Yes | NRAS   |           |                     |            |
| Noonan005 | 9.0  | M | Noonan syndrome          | No  |        |           |                     |            |
| Noonan006 | 4.0  | M | Noonan syndrome          | No  |        |           |                     |            |
| Noonan007 | 46.5 | M | Noonan syndrome          | No  |        |           |                     |            |
| Noonan008 | 47.6 | F | Noonan syndrome          | Yes | PTPN11 |           |                     |            |
| Noonan009 | 7.4  | M | Noonan syndrome          | No  |        |           |                     |            |
| Noonan010 | 13.2 | M | Noonan syndrome          | Yes | PTPN11 |           |                     |            |
| Noonan011 | 40.9 | F | Noonan syndrome          | Yes | PTPN11 |           |                     |            |
| Noonan012 | 16.5 | F | Noonan syndrome          | No  |        |           |                     |            |
| Noonan013 | 12.6 | M | Noonan syndrome          | No  |        |           |                     |            |
| Noonan014 | 5.0  | F | Noonan syndrome          | No  |        |           |                     |            |
| Noonan015 | 37.2 | F | Noonan syndrome          | No  |        |           |                     |            |
| Noonan016 | 5.2  | F | Noonan syndrome          | No  |        |           |                     |            |
| Noonan017 | 18.6 | M | Noonan syndrome          | No  |        |           |                     |            |
| Noonan018 | 7.1  | F | Noonan syndrome          | No  |        |           |                     |            |
| Noonan019 | 38.3 | F | Noonan syndrome          | No  |        |           |                     |            |
| Noonan020 | 1.2  | F | Noonan syndrome          | Yes | PTPN11 |           |                     |            |

|           |      |   |                 |     |        |
|-----------|------|---|-----------------|-----|--------|
| Noonan021 | 2.0  | M | Noonan syndrome | No  |        |
| Noonan022 | 7.9  | M | Noonan syndrome | No  |        |
| Noonan023 | 5.3  | M | Noonan syndrome | No  |        |
| Noonan024 | 45.5 | M | Noonan syndrome | No  |        |
| Noonan025 | 6.0  | F | Noonan syndrome | Yes | PTPN11 |
| Noonan026 | 7.6  | M | Noonan syndrome | No  |        |
| Noonan027 | 8.3  | M | Noonan syndrome | No  |        |
| Noonan028 | 6.3  | M | Noonan syndrome | Yes | PTPN11 |
| Noonan029 | 37.3 | F | Noonan syndrome | Yes | PTPN11 |
| Noonan030 | 7.2  | M | Noonan syndrome | No  |        |
| Noonan031 | 5.1  | M | Noonan syndrome | Yes | BRAF   |
| Noonan032 | 0.8  | M | Noonan syndrome | No  |        |
| Noonan033 | 19.0 | F | Noonan syndrome | Yes | PTPN11 |
| Noonan034 | 8.4  | M | Noonan syndrome | No  |        |
| Noonan035 | 8.4  | M | Noonan syndrome | No  |        |
| Noonan036 | 2.7  | M | Noonan syndrome | Yes | PTPN11 |
| Noonan037 | 5.9  | F | Noonan syndrome | No  |        |
| Noonan038 | 5.6  | F | Noonan syndrome | No  |        |
| Noonan039 | 11.8 | F | Noonan syndrome | No  |        |
| Noonan040 | 23.1 | M | Noonan syndrome | No  |        |
| Noonan041 | 17.5 | M | Noonan syndrome | No  |        |
| Noonan042 | 28.6 | F | Noonan syndrome | No  |        |
| Noonan043 | 10.1 | M | Noonan syndrome | No  |        |
| Noonan044 | 11.2 | F | Noonan syndrome | No  |        |
| Noonan045 | 37.8 | M | Noonan syndrome | No  |        |
| Noonan046 | 2.5  | F | Noonan syndrome | No  |        |
| Noonan047 | 8.7  | F | Noonan syndrome | No  |        |

|           |      |   |                 |     |        |
|-----------|------|---|-----------------|-----|--------|
| Noonan048 | 42.6 | M | Noonan syndrome | No  |        |
| Noonan049 | 0.6  | M | Noonan syndrome | No  |        |
| Noonan050 | 13.5 | F | Noonan syndrome | No  |        |
| Noonan051 | 16.0 | F | Noonan syndrome | Yes | PTPN11 |
| Noonan052 | 12.7 | M | Noonan syndrome | Yes | PTPN11 |
| Noonan053 | 4.6  | M | Noonan syndrome | No  |        |
| Noonan054 | 10.0 | F | Noonan syndrome | No  |        |
| Noonan055 | 4.5  | M | Noonan syndrome | No  |        |
| Noonan056 | 29.5 | M | Noonan syndrome | No  |        |
| Noonan057 | 16.0 | M | Noonan syndrome | No  |        |
| Noonan058 | 8.2  | M | Noonan syndrome | No  |        |
| Noonan059 | 2.6  | M | Noonan syndrome | No  |        |
| Noonan060 | 44.6 | F | Noonan syndrome | No  |        |
| Noonan061 | 19.5 | M | Noonan syndrome | Yes | PTPN11 |
| Noonan062 | 2.4  | F | Noonan syndrome | Yes | PTPN11 |
| Noonan063 | 4.5  | M | Noonan syndrome | No  |        |
| Noonan064 | 5.7  | M | Noonan syndrome | No  |        |
| Noonan065 | 10.0 | F | Noonan syndrome | No  |        |
| Noonan066 | 7.4  | M | Noonan syndrome | No  |        |
| Noonan067 | 7.4  | M | Noonan syndrome | No  |        |
| Noonan068 | 1.8  | F | Noonan syndrome | No  |        |
| Noonan069 | 39.7 | M | Noonan syndrome | No  |        |
| Noonan070 | 9.4  | M | Noonan syndrome | No  |        |
| Noonan071 | 2.0  | F | Noonan syndrome | No  |        |
| Noonan072 | 1.9  | M | Noonan syndrome | Yes | PTPN11 |
| Noonan073 | 2.4  | M | Noonan syndrome | Yes | PTPN11 |
| Noonan074 | 1.7  | M | Noonan syndrome | Yes | PTPN11 |

|           |      |   |                 |     |        |           |             |            |
|-----------|------|---|-----------------|-----|--------|-----------|-------------|------------|
| Noonan075 | 3.1  | M | Noonan syndrome | No  |        |           |             |            |
| Noonan076 | 6.4  | M | Noonan syndrome | No  |        |           |             |            |
| Noonan077 | 12.1 | M | Noonan syndrome | Yes | PTPN11 |           |             |            |
| Noonan078 | 30.4 | F | Noonan syndrome | Yes | SOS1   |           |             |            |
| Noonan079 | 0.8  | F | Noonan syndrome | Yes | SOS1   |           |             |            |
| Noonan080 | 14.9 | F | Noonan syndrome | Yes | PTPN11 | c.922A>G  | p.Asn308Asp | Pathogenic |
| Noonan081 | 18.4 | M | Noonan syndrome | No  |        |           |             |            |
| Noonan082 | 6.5  | M | Noonan syndrome | Yes | PTPN11 | c.1472C>A | p.Pro491His | Pathogenic |
| Noonan083 | 5.9  | F | Noonan syndrome | Yes | PTPN11 | c.1510A>G | p.Met504Val | Pathogenic |
| Noonan084 | 5.5  | F | Noonan syndrome | Yes | PTPN11 | c.922A>G  | p.Asn308Asp | Pathogenic |
| Noonan085 | 31.3 | F | Noonan syndrome | Yes | PTPN11 | c.922A>G  | p.Asn308Asp | Pathogenic |
| Noonan086 | 17.5 | M | Noonan syndrome | Yes | PTPN11 | c.922A>G  | p.Asn308Asp | Pathogenic |
| Noonan087 | 5.0  | F | Noonan syndrome | No  |        |           |             |            |
| Noonan088 | 2.1  | M | Noonan syndrome | No  |        |           |             |            |
| Noonan089 | 1.3  | F | Noonan syndrome | Yes | PTPN11 | c.802G>T  | p.Gly268Cys | Pathogenic |
| Noonan090 | 19.3 | M | Noonan syndrome | Yes | PTPN11 |           |             |            |
| Noonan091 | 51.9 | F | Noonan syndrome | Yes | PTPN11 | c.317A>C  | p.Asp106Ala | Pathogenic |
| Noonan092 | 36.4 | F | Noonan syndrome | No  |        |           |             |            |
| Noonan093 | 21.7 | F | Noonan syndrome | No  |        |           |             |            |
| Noonan094 | 17.2 | F | Noonan syndrome | Yes | PTPN11 | c.417G>C  | p.Glu139Asp | Pathogenic |
| Noonan095 | 8.3  | M | Noonan syndrome | Yes | RAF1   |           |             |            |
| Noonan096 | 13.5 | F | Noonan syndrome | Yes | PTPN11 |           |             |            |
| Noonan097 | 18.9 | M | Noonan syndrome | Yes | PTPN11 |           |             |            |
| Noonan098 | 3.8  | M | Noonan syndrome | Yes | PTPN11 | c.923A>G  | p.Asn308Ser | Pathogenic |
| Noonan099 | 9.6  | M | Noonan syndrome | Yes | PTPN11 |           |             |            |
| Noonan100 | 15.3 | F | Noonan syndrome | Yes | PTPN11 | c.1403C>T | p.Thr468Met | Pathogenic |
| Noonan101 | 3.9  | M | Noonan syndrome | Yes | PTPN11 |           |             |            |



|           |      |   |                 |     |        |           |              |                        |
|-----------|------|---|-----------------|-----|--------|-----------|--------------|------------------------|
| Noonan102 | 0.3  | F | Noonan syndrome | Yes | PTPN11 |           |              |                        |
| Noonan103 | 34.6 | F | Noonan syndrome | No  |        |           |              |                        |
| Noonan104 | 8.6  | M | Noonan syndrome | Yes | PTPN11 | c.1471C>T | p.Pro491Ser  | Pathogenic             |
| Noonan105 | 9.2  | F | Noonan syndrome | No  |        |           |              |                        |
| Noonan106 | 16.4 | F | Noonan syndrome | Yes | PTPN11 |           |              |                        |
| Noonan107 | 15.6 | M | Noonan syndrome | Yes | PTPN11 |           |              |                        |
| Noonan108 | 10.3 | M | Noonan syndrome | Yes | PTPN11 |           |              |                        |
| Noonan109 | 6.4  | M | Noonan syndrome | Yes | PTPN11 |           |              |                        |
| Noonan110 | 27.3 | F | Noonan syndrome | Yes | PTPN11 |           |              |                        |
| Noonan111 | 9.6  | M | Noonan syndrome | Yes | SOS1   | c.1654A>G | p.Arg552Gly  | Pathogenic             |
| Noonan112 | 36.3 | F | Noonan syndrome | Yes | SOS1   | c.1654A>G | p.Arg552Gly  | Pathogenic             |
| Noonan113 | 26.9 | F | Noonan syndrome | No  |        |           |              |                        |
| Noonan114 | 24.8 | M | Noonan syndrome | Yes | SOS1   |           |              |                        |
| Noonan115 | 24.5 | F | Noonan syndrome | Yes | RAF1   |           |              |                        |
| Noonan116 | 12.2 | M | Noonan syndrome | Yes | PTPN11 |           |              |                        |
| Noonan117 | 15.7 | M | Noonan syndrome | Yes | SOS1   |           |              |                        |
| Noonan118 | 4.2  | M | Noonan syndrome | Yes | PTPN11 |           |              |                        |
| Noonan119 | 9.7  | F | Noonan syndrome | Yes | SHOC2  | c.4A>G    | p.Ser2Gly    | Pathogenic             |
| Noonan120 | 9.7  | F | Noonan syndrome | Yes | SHOC2  | c.4A>G    | p.Ser2Gly    | Pathogenic             |
| Noonan121 | 17.7 | F | Noonan syndrome | Yes | SOS1   | c.1859A>G | p.Asp.620Gly | Likely Pathogenic      |
| Noonan122 | 54.3 | F | Noonan syndrome | Yes | SOS1   | c.1310T>C | p.Ile437Thr  | Pathogenic             |
| Noonan123 | 3.9  | F | Noonan syndrome | Yes | PTPN11 | c.184T>G  | p.Tyr62Asp   | Pathogenic             |
| Noonan124 | 4.7  | M | Noonan syndrome | Yes | CBL    | c.1477C>T | p.Leu493Phe  | Uncertain Significance |
| Noonan125 | 8.0  | F | Noonan syndrome | Yes | PTPN11 | c.1403C>T | p.Thr468Met  | Pathogenic             |
| Noonan126 | 6.7  | M | Noonan syndrome | Yes | PTPN11 | c.1403C>T | p.Thr468Met  | Pathogenic             |
| Noonan127 | 13.0 | M | Noonan syndrome | Yes | PTPN11 | c.1403C>T | p.Thr468Met  | Pathogenic             |
| Noonan128 | 12.1 | M | Noonan syndrome | Yes | SOS1   | c.1310T>C | p.Ile437Thr  | Pathogenic             |

|           |     |   |                 |    |
|-----------|-----|---|-----------------|----|
| Noonan129 | 5.8 | M | Noonan syndrome | No |
|-----------|-----|---|-----------------|----|

---

Supplementary Table 3. Samples used to calculate the distributions of the directional variation, severity variation, phenotype agreement and severity difference statistics shown in Supplementary Figure 1. The sample contains only patients of European ancestry. It is known that in the portion of the data coming from the Peter Hammond collection images of the same participant, taken at multiple times, were not always linked by a consistent subject ID. As such this data (although not the RASopathy sample) may contain duplicate images of the same subjects.

| <b>Condition</b>                      | <b>N(Female)</b> | <b>Age Median (IQR)</b> |
|---------------------------------------|------------------|-------------------------|
| 22q11.2 Del                           | 146(71)          | 9.25(7.70)              |
| 5p Del Cri du Chat                    | 61(34)           | 13.03(15.90)            |
| Achondroplasia                        | 46(29)           | 16.28(23.17)            |
| Alstrom                               | 40(19)           | 23.85(17.60)            |
| Angelman                              | 100(49)          | 8.15(8.57)              |
| Bardet Biedl                          | 81(40)           | 24.50(22.92)            |
| CHARGE                                | 89(48)           | 13.16(11.23)            |
| Cleft Lip Palate                      | 76(27)           | 9.39(6.12)              |
| Cockayne                              | 33(15)           | 10.64(9.58)             |
| Cohen                                 | 27(15)           | 18.58(15.75)            |
| Cornelia de Lange                     | 169(91)          | 11.03(11.59)            |
| Trisomy 21                            | 86(47)           | 19.71(17.00)            |
| Ectodermal Dysplasia                  | 59(16)           | 9.80(10.00)             |
| Ehlers Danlos                         | 86(73)           | 28.42(32.40)            |
| Fabry                                 | 35(15)           | 35.80(26.10)            |
| Fibrodysplasia Ossificans Progressiva | 50(28)           | 18.90(11.90)            |
| Fragile X                             | 62(20)           | 14.95(17.40)            |
| Galactosemia                          | 38(21)           | 18.65(18.40)            |
| Jacobsen                              | 53(33)           | 10.60(9.80)             |
| Joubert                               | 46(21)           | 8.14(8.90)              |
| Klinefelter                           | 39(0)            | 16.65(8.60)             |
| Loeys Dietz                           | 62(38)           | 19.94(21.47)            |
| Marfan                                | 84(54)           | 20.79(22.82)            |
| Mucopolysaccharidosis                 | 47(22)           | 18.65(12.42)            |
| Pallister Killian                     | 23(7)            | 7.22(7.40)              |
| Phelan McDermid                       | 37(16)           | 9.46(11.20)             |
| Pitt Hopkins                          | 25(15)           | 8.56(8.41)              |
| Prader Willi                          | 87(43)           | 15.40(21.70)            |
| Pseudoachondroplasia                  | 25(11)           | 24.42(26.75)            |
| Rett                                  | 45(43)           | 11.30(8.70)             |
| Rubinstein Taybi                      | 57(30)           | 9.75(12.40)             |
| Russell Silver                        | 31(8)            | 7.11(5.43)              |
| Smith Magenis                         | 112(60)          | 12.40(11.50)            |
| Sotos                                 | 37(18)           | 15.00(11.67)            |
| Stickler                              | 25(16)           | 20.25(27.08)            |
| Trisomy 18                            | 20(17)           | 4.70(14.43)             |
| Turner                                | 76(76)           | 17.84(25.40)            |
| Williams                              | 198(93)          | 13.50(19.70)            |
| Wolf Hirschhorn                       | 132(73)          | 7.40(8.50)              |

Supplementary Table 4. Percentiles of the directional variation, severity variation, phenotype agreement and severity difference statistics computed from the sample of disorders described in Supplementary Table 1.

| Percentile | Directional Variation | Severity Variation | Phenotype Agreement | Absolute Value of Severity Difference |
|------------|-----------------------|--------------------|---------------------|---------------------------------------|
| 1          | 0.404999599           | 28.92045205        | -0.52858594         | 0.016847016                           |
| 2          | 0.41691339            | 29.69415697        | -0.485725252        | 0.021956743                           |
| 3          | 0.433507598           | 30.7718174         | -0.445224629        | 0.031892556                           |
| 4          | 0.448709565           | 31.80459449        | -0.425861184        | 0.043587749                           |
| 5          | 0.456254203           | 32.59051316        | -0.400588616        | 0.050268766                           |
| 6          | 0.46379884            | 33.37643182        | -0.353876627        | 0.070652875                           |
| 7          | 0.484689684           | 35.45224114        | -0.339692853        | 0.091097979                           |
| 8          | 0.514864846           | 38.42536568        | -0.318528068        | 0.101799021                           |
| 9          | 0.544270101           | 41.32330631        | -0.301932579        | 0.112765583                           |
| 10         | 0.544418946           | 41.36425794        | -0.272389088        | 0.124896126                           |
| 11         | 0.544567791           | 41.40520958        | -0.246851531        | 0.130653152                           |
| 12         | 0.549794209           | 42.42365033        | -0.233848096        | 0.141251409                           |
| 13         | 0.560944463           | 44.58249504        | -0.206593641        | 0.157235544                           |
| 14         | 0.572094716           | 46.74133976        | -0.189189947        | 0.160257308                           |
| 15         | 0.574371473           | 47.32777583        | -0.175639719        | 0.1691268                             |
| 16         | 0.575634115           | 47.73450807        | -0.153246915        | 0.179394117                           |
| 17         | 0.577545298           | 48.04556819        | -0.137678098        | 0.190353735                           |
| 18         | 0.58075356            | 48.16528408        | -0.127254361        | 0.200124617                           |
| 19         | 0.583961823           | 48.28499997        | -0.119635721        | 0.214921595                           |
| 20         | 0.58826769            | 48.40684978        | -0.102030942        | 0.224104632                           |
| 21         | 0.592902839           | 48.52933976        | -0.092151505        | 0.235993994                           |
| 22         | 0.596618194           | 48.62921088        | -0.077809264        | 0.247289468                           |
| 23         | 0.596769349           | 48.64143392        | -0.06651491         | 0.257490421                           |
| 24         | 0.596920503           | 48.65365696        | -0.054163178        | 0.272063147                           |
| 25         | 0.597867259           | 49.46089825        | -0.043292773        | 0.279704625                           |
| 26         | 0.599259551           | 50.71334978        | -0.025370132        | 0.287243384                           |
| 27         | 0.600590289           | 51.87781068        | -0.014045098        | 0.298807062                           |
| 28         | 0.601182369           | 51.98638412        | -0.006242112        | 0.308058208                           |
| 29         | 0.601774449           | 52.09495756        | 0.000322494         | 0.316834715                           |
| 30         | 0.60286507            | 52.34537563        | 0.012634634         | 0.32727041                            |
| 31         | 0.604429303           | 52.7305461         | 0.024875947         | 0.33640357                            |
| 32         | 0.605993536           | 53.11571657        | 0.034724832         | 0.351132668                           |
| 33         | 0.608881173           | 53.41453815        | 0.042863877         | 0.368565002                           |
| 34         | 0.611840345           | 53.70869223        | 0.05612422          | 0.375131549                           |
| 35         | 0.613835775           | 53.97945631        | 0.068660436         | 0.39415268                            |
| 36         | 0.61428922            | 54.2127964         | 0.07463783          | 0.404921783                           |
| 37         | 0.614742664           | 54.44613649        | 0.086679864         | 0.420028861                           |
| 38         | 0.615680065           | 55.31488247        | 0.096996213         | 0.432109909                           |
| 39         | 0.616723331           | 56.32262349        | 0.113122373         | 0.445920564                           |
| 40         | 0.619354165           | 57.09764799        | 0.12264453          | 0.456350037                           |
| 41         | 0.626588942           | 57.19779458        | 0.135664084         | 0.470895852                           |
| 42         | 0.633823718           | 57.29794117        | 0.147722802         | 0.494885555                           |
| 43         | 0.636096646           | 57.56437           | 0.156544542         | 0.514116247                           |
| 44         | 0.636164307           | 57.90470205        | 0.16620765          | 0.532014946                           |
| 45         | 0.636452491           | 58.2750225         | 0.1709629           | 0.54865238                            |

|    |             |             |             |             |
|----|-------------|-------------|-------------|-------------|
| 46 | 0.638240232 | 58.84926406 | 0.180212157 | 0.565157187 |
| 47 | 0.640027973 | 59.42350561 | 0.192127323 | 0.569425485 |
| 48 | 0.643633462 | 59.82844935 | 0.198317709 | 0.580330584 |
| 49 | 0.648643577 | 60.10257205 | 0.206122841 | 0.597527253 |
| 50 | 0.653653691 | 60.37669475 | 0.212676274 | 0.614732872 |
| 51 | 0.653922338 | 60.39669513 | 0.219226314 | 0.630485583 |
| 52 | 0.654190984 | 60.4166955  | 0.223379421 | 0.643380665 |
| 53 | 0.657222874 | 60.48027156 | 0.228085102 | 0.653735383 |
| 54 | 0.663830725 | 60.60023969 | 0.23749279  | 0.673943029 |
| 55 | 0.670438576 | 60.72020782 | 0.251534632 | 0.683933297 |
| 56 | 0.674979863 | 60.75346087 | 0.263092644 | 0.699428863 |
| 57 | 0.679217244 | 60.7739617  | 0.27420552  | 0.715200795 |
| 58 | 0.68265319  | 60.92039418 | 0.278728141 | 0.74044451  |
| 59 | 0.684285909 | 61.35017287 | 0.284528862 | 0.758677151 |
| 60 | 0.685918627 | 61.77995156 | 0.29123443  | 0.787295617 |
| 61 | 0.686591799 | 62.11642507 | 0.298745538 | 0.81105458  |
| 62 | 0.686934092 | 62.42072439 | 0.305713738 | 0.844772068 |
| 63 | 0.687565368 | 62.68240575 | 0.319709285 | 0.860189119 |
| 64 | 0.689517707 | 62.74926218 | 0.325550635 | 0.871315338 |
| 65 | 0.691470046 | 62.81611861 | 0.331809459 | 0.885007217 |
| 66 | 0.696886125 | 63.17359125 | 0.335124464 | 0.898300364 |
| 67 | 0.704467042 | 63.71269902 | 0.34129593  | 0.918053963 |
| 68 | 0.711883745 | 64.25939104 | 0.350479885 | 0.933788091 |
| 69 | 0.716262492 | 64.94639162 | 0.359060528 | 0.946742761 |
| 70 | 0.720641238 | 65.63339219 | 0.368632278 | 0.974973159 |
| 71 | 0.725311118 | 66.09200876 | 0.375512234 | 0.991180644 |
| 72 | 0.730287454 | 66.31022111 | 0.382475387 | 1.00885399  |
| 73 | 0.73526379  | 66.52843345 | 0.390684364 | 1.043605521 |
| 74 | 0.741733141 | 66.82796853 | 0.396356167 | 1.079276615 |
| 75 | 0.74832691  | 67.13428051 | 0.40249041  | 1.101180428 |
| 76 | 0.752678911 | 67.48566791 | 0.409013986 | 1.114756503 |
| 77 | 0.753027756 | 67.91754717 | 0.420882268 | 1.141143105 |
| 78 | 0.753376602 | 68.34942642 | 0.426383015 | 1.162120011 |
| 79 | 0.755461418 | 69.43105669 | 0.434304392 | 1.184544405 |
| 80 | 0.757994227 | 70.68036465 | 0.441321488 | 1.230923428 |
| 81 | 0.760371186 | 71.87864921 | 0.450976424 | 1.257246158 |
| 82 | 0.762228645 | 72.90685582 | 0.45956105  | 1.289676885 |
| 83 | 0.764086105 | 73.93506243 | 0.472471772 | 1.307930182 |
| 84 | 0.765616672 | 74.85288998 | 0.482581664 | 1.354532256 |
| 85 | 0.766983794 | 75.71552799 | 0.491598671 | 1.382650721 |
| 86 | 0.768777103 | 76.49413663 | 0.500678837 | 1.429282333 |
| 87 | 0.774299547 | 76.53748826 | 0.512852073 | 1.462859138 |
| 88 | 0.779821992 | 76.5808399  | 0.528063164 | 1.501453554 |
| 89 | 0.7843843   | 76.86151901 | 0.539582697 | 1.528268688 |
| 90 | 0.788123635 | 77.34562167 | 0.547404315 | 1.585376202 |
| 91 | 0.79186297  | 77.82972433 | 0.559359602 | 1.645946186 |
| 92 | 0.794951644 | 77.86422628 | 0.566901366 | 1.704244215 |
| 93 | 0.798023194 | 77.88689663 | 0.578600136 | 1.768111948 |
| 94 | 0.803268253 | 79.52813461 | 0.593754561 | 1.843759203 |

|     |             |             |             |             |
|-----|-------------|-------------|-------------|-------------|
| 95  | 0.811637728 | 83.49606358 | 0.609212164 | 1.926300134 |
| 96  | 0.820007203 | 87.46399254 | 0.618909216 | 2.098060149 |
| 97  | 0.857372891 | 89.70020562 | 0.646134562 | 2.250903694 |
| 98  | 0.900010617 | 91.62156127 | 0.672879985 | 2.414908545 |
| 99  | 0.930622318 | 93.00099609 | 0.726058879 | 2.567521846 |
| 100 | 0.930622318 | 93.00099609 | 0.858244726 | 2.957309988 |

---
